# Supplementary material for: Classifying Integrated Signature Molecules in Macrophages of Rheumatoid Arthritis, Osteoarthritis, and Periodontal Disease: An Omics-Based Study
Source: MDPI journal article supplement (doi:10.3390/cimb44080241), 2022-08-06
Supplement: s1 [file s1]

**Table S1: Details of 72 Common DEGs**

| S.No. | Gene Name      |          | RA       |          | OA       |          | PG       |          |
|-------|----------------|----------|----------|----------|----------|----------|----------|----------|
|       | <i>SYMBOL</i>  | ENTREZID | P.Value  | logFC    | P.Value  | logFC    | P.Value  | logFC    |
| 1     | <i>ABHD5</i>   | 51099    | 0.002443 | -0.56578 | 0.020179 | -3.10629 | 0.000509 | -0.70691 |
| 2     | <i>AKAP13</i>  | 11214    | 2.15E-06 | 1.092525 | 0.01827  | 2.118771 | 0.0002   | 0.924739 |
| 3     | <i>API5</i>    | 8539     | 5.17E-05 | 0.948967 | 0.044049 | -1.61151 | 0.003568 | -0.83848 |
| 4     | <i>ATE1</i>    | 11101    | 7.50E-05 | -0.68299 | 0.010635 | -0.90888 | 0.002123 | -1.01828 |
| 5     | <i>ATP1B1</i>  | 481      | 0.002511 | -1.45661 | 0.027328 | 3.118706 | 0.000517 | 0.776784 |
| 6     | <i>ATPAF1</i>  | 64756    | 0.006199 | -0.65636 | 0.00396  | -1.31407 | 0.002152 | -0.89802 |
| 7     | <i>B4GALT5</i> | 9334     | 0.010165 | 0.746297 | 0.040347 | 2.219408 | 2.15E-05 | 1.346279 |
| 8     | <i>BLOC1S2</i> | 282991   | 1.10E-06 | -1.19876 | 0.017607 | -0.66175 | 0.000387 | -0.6478  |
| 9     | <i>CAB39L</i>  | 81617    | 3.15E-07 | -1.92443 | 0.003059 | 4.237594 | 0.000456 | -1.23121 |
| 10    | <i>CCDC66</i>  | 285331   | 0.001966 | -0.64955 | 0.003516 | -3.63235 | 0.000159 | -0.9599  |
| 11    | <i>CCNG1</i>   | 900      | 0.000262 | -0.7122  | 0.008933 | -1.613   | 0.001181 | -0.78366 |
| 12    | <i>CD300A</i>  | 11314    | 0.011903 | 0.69621  | 0.010745 | 3.115973 | 5.86E-05 | -0.74556 |
| 13    | <i>CHST13</i>  | 166012   | 2.67E-06 | -2.44549 | 0.034288 | 0.504662 | 0.002919 | -0.70979 |
| 14    | <i>CISD1</i>   | 55847    | 0.00416  | -1.03413 | 0.031482 | -2.78761 | 0.002289 | -0.80914 |
| 15    | <i>CLIP4</i>   | 79745    | 0.002999 | -0.64836 | 0.011162 | -3.54783 | 0.000257 | -1.12684 |
| 16    | <i>DAGLB</i>   | 221955   | 0.001786 | 1.117383 | 0.006518 | 1.843946 | 0.000164 | -0.76796 |
| 17    | <i>DNAAF1</i>  | 123872   | 0.006008 | 1.918584 | 0.01782  | 4.193941 | 2.57E-06 | 2.29468  |
| 18    | <i>EHD1</i>    | 10938    | 1.31E-05 | 2.130844 | 0.041034 | -2.59141 | 4.34E-06 | 2.083501 |
| 19    | <i>ERCC1</i>   | 2067     | 0.000607 | 0.919528 | 0.015691 | -2.8963  | 0.000494 | -0.64705 |
| 20    | <i>ETFA</i>    | 2108     | 5.67E-05 | -0.62781 | 0.014883 | 1.389631 | 0.002729 | -0.52794 |
| 21    | <i>FBXO28</i>  | 23219    | 0.002614 | -0.52079 | 0.008138 | 0.525873 | 0.001003 | -0.77731 |
| 22    | <i>FH</i>      | 2271     | 0.000411 | -0.6469  | 0.007016 | -3.76123 | 0.001566 | -1.09595 |
| 23    | <i>FMNL1</i>   | 752      | 5.56E-08 | 1.528973 | 0.026812 | -2.89386 | 3.80E-05 | 1.036113 |
| 24    | <i>FSD1L</i>   | 83856    | 0.000751 | 1.108685 | 0.015012 | 3.816089 | 0.001085 | 1.099068 |
| 25    | <i>GFM2</i>    | 84340    | 0.000152 | -1.04212 | 0.008164 | -2.76709 | 0.000103 | -0.89154 |
| 26    | <i>GGCT</i>    | 79017    | 1.70E-05 | -0.8628  | 0.012418 | 2.605323 | 0.000214 | -0.75831 |
| 27    | <i>GZF1</i>    | 64412    | 0.007052 | 0.947051 | 0.001678 | -3.57112 | 0.000761 | -1.47368 |

|    |                |        |          |          |          |          |          |          |
|----|----------------|--------|----------|----------|----------|----------|----------|----------|
| 28 | <i>HNMT</i>    | 3176   | 1.09E-05 | -1.1326  | 0.007327 | -1.42762 | 0.001013 | -0.82189 |
| 29 | <i>IER3</i>    | 8870   | 1.79E-05 | 1.58268  | 0.036425 | 1.61056  | 8.52E-09 | 3.691343 |
| 30 | <i>IL6</i>     | 3569   | 0.005851 | 1.426971 | 0.04803  | -2.54602 | 1.02E-08 | 6.170007 |
| 31 | <i>INTS10</i>  | 55174  | 0.012768 | -0.81647 | 0.023895 | 2.882221 | 0.000466 | -0.83698 |
| 32 | <i>KBTBD7</i>  | 84078  | 2.97E-09 | -3.02472 | 0.041311 | 1.668666 | 0.001699 | -0.89937 |
| 33 | <i>KDM7A</i>   | 80853  | 2.69E-05 | 1.081884 | 0.047432 | 2.1846   | 0.002626 | 0.819238 |
| 34 | <i>KLHL28</i>  | 54813  | 6.93E-05 | -0.85664 | 0.034672 | 3.240225 | 8.10E-07 | 1.468859 |
| 35 | <i>LRP12</i>   | 29967  | 0.007109 | -1.14802 | 0.020469 | 0.644235 | 0.000774 | 1.10113  |
| 36 | <i>MBLAC2</i>  | 153364 | 9.60E-05 | -1.51133 | 0.000336 | -3.85063 | 1.97E-05 | -0.92086 |
| 37 | <i>MBTPS2</i>  | 51360  | 0.000197 | -0.60447 | 1.19E-05 | -1.72224 | 0.003269 | -0.7793  |
| 38 | <i>MCEE</i>    | 84693  | 7.85E-05 | -0.73856 | 0.02115  | 0.793102 | 0.000452 | -1.11363 |
| 39 | <i>METTL25</i> | 84190  | 0.001244 | -0.63086 | 0.037937 | 0.724949 | 0.003103 | -0.70809 |
| 40 | <i>MLLT10</i>  | 8028   | 0.001097 | -0.57958 | 0.047278 | 2.742738 | 4.65E-05 | -0.99596 |
| 41 | <i>MOSPD1</i>  | 56180  | 5.56E-09 | -1.47123 | 0.003234 | 3.405434 | 0.003576 | -0.94579 |
| 42 | <i>MPP5</i>    | 64398  | 3.46E-08 | -2.4948  | 0.030964 | 2.322848 | 0.003249 | -0.8469  |
| 43 | <i>MRPL39</i>  | 54148  | 0.009186 | 0.88486  | 0.035387 | 2.047736 | 0.000249 | -0.78253 |
| 44 | <i>MTIF3</i>   | 219402 | 0.001492 | -0.78276 | 0.045675 | -0.6177  | 4.02E-05 | -1.21492 |
| 45 | <i>NLRP3</i>   | 114548 | 1.57E-07 | 4.303286 | 0.016642 | -1.11036 | 2.44E-05 | 2.918478 |
| 46 | <i>PMEPA1</i>  | 56937  | 0.000682 | 1.412264 | 0.041631 | -2.23103 | 0.000562 | 0.656428 |
| 47 | <i>PNKD</i>    | 25953  | 1.72E-05 | -1.16772 | 0.006833 | -0.73991 | 0.000426 | -0.82808 |
| 48 | <i>PNRC1</i>   | 10957  | 0.007087 | 0.597413 | 0.041306 | 1.757568 | 1.50E-06 | 1.880961 |
| 49 | <i>PPP1R18</i> | 170954 | 0.001211 | 0.597533 | 0.047425 | 1.476029 | 7.71E-06 | 1.106381 |
| 50 | <i>PSTPIP1</i> | 9051   | 1.46E-06 | 1.878514 | 0.045162 | 1.495317 | 0.000169 | -0.81923 |
| 51 | <i>RCBTB2</i>  | 1102   | 0.000346 | -0.78763 | 0.048169 | 1.972613 | 0.001071 | -1.38603 |
| 52 | <i>RFK</i>     | 55312  | 5.99E-05 | 1.03999  | 0.018353 | 2.625587 | 0.001629 | -0.76247 |
| 53 | <i>RGS16</i>   | 6004   | 0.005979 | 1.14111  | 0.022101 | 2.358466 | 7.23E-06 | 1.065291 |
| 54 | <i>RHNO1</i>   | 83695  | 0.000957 | -0.59207 | 0.030542 | 2.126232 | 0.001321 | -1.00823 |
| 55 | <i>RIN2</i>    | 54453  | 7.06E-05 | 3.051098 | 0.042093 | -1.46963 | 0.000764 | -1.55874 |
| 56 | <i>RPAP3</i>   | 79657  | 0.002535 | -0.53975 | 0.011583 | -0.78553 | 0.000388 | -1.59776 |
| 57 | <i>RPGR</i>    | 6103   | 0.002118 | 0.651429 | 0.043931 | 2.703224 | 0.00043  | 0.72406  |
| 58 | <i>RPUSD3</i>  | 285367 | 4.03E-05 | -1.10226 | 0.046301 | -0.58511 | 0.000135 | -1.08247 |

|    |                |        |          |          |          |          |          |          |
|----|----------------|--------|----------|----------|----------|----------|----------|----------|
| 59 | <i>SAMHD1</i>  | 25939  | 0.000158 | 0.653058 | 0.016753 | -3.903   | 0.003645 | -1.28668 |
| 60 | <i>SAR1B</i>   | 51128  | 1.06E-05 | -0.73891 | 0.000472 | 0.842645 | 0.000388 | -0.78643 |
| 61 | <i>SLC1A2</i>  | 6506   | 0.011151 | 1.88593  | 0.022717 | -1.38018 | 9.13E-07 | 2.859791 |
| 62 | <i>SLC20A1</i> | 6574   | 0.000207 | 0.571868 | 0.013494 | -1.41614 | 0.001468 | -0.77487 |
| 63 | <i>SQSTM1</i>  | 8878   | 2.40E-06 | -1.3107  | 0.030014 | -2.45249 | 0.002504 | 0.90745  |
| 64 | <i>SYNRG</i>   | 11276  | 0.004741 | -0.59859 | 0.007395 | -2.74597 | 0.000155 | -0.76539 |
| 65 | <i>TAPBP</i>   | 6892   | 3.92E-05 | 0.913076 | 0.030057 | 2.118014 | 0.000712 | 0.909168 |
| 66 | <i>TBC1D12</i> | 23232  | 0.001189 | -0.73789 | 0.003551 | 0.655343 | 0.001446 | 0.546048 |
| 67 | <i>THEM4</i>   | 117145 | 0.000146 | 0.778283 | 0.039497 | 2.014082 | 0.00089  | -0.7336  |
| 68 | <i>TMCC1</i>   | 23023  | 1.23E-07 | -1.21068 | 6.16E-06 | 5.415481 | 0.0004   | -1.14181 |
| 69 | <i>TMED8</i>   | 283578 | 2.75E-05 | -0.8267  | 0.021837 | 2.55728  | 0.003496 | -0.83207 |
| 70 | <i>TMEM263</i> | 90488  | 0.000919 | -0.73695 | 0.034029 | -1.29565 | 0.003673 | -0.90391 |
| 71 | <i>TNF</i>     | 7124   | 2.39E-06 | 2.421162 | 0.011977 | -3.41913 | 5.54E-08 | 5.240661 |
| 72 | <i>TRAF3</i>   | 7187   | 3.54E-06 | -1.18885 | 0.03868  | -0.81485 | 0.001364 | 0.6176   |

**Table S2: GeneMANIA Output for Protein-Protein interaction network**

| Gene name | Nod e type | Name                  | Synonym | Log score | Score    | RefSeq mRNA ID | RefSeq Protein ID | Uniprot ID | Ensembl Gene ID  | Ensembl Protein ID | Entre z Gene ID |
|-----------|------------|-----------------------|---------|-----------|----------|----------------|-------------------|------------|------------------|--------------------|-----------------|
| RPAP3     | query      | H__sapiens__4_-701058 | spag    | -0.31775  | 0.727781 | NM_024604      | NP_078880         | Q9H6T3     | ENSG000000005175 | ENSP00000401823    | 79657           |
| ABHD5     | query      | H__sapiens__4_-701259 | NCIE2   | -0.26487  | 0.767309 | NM_016006      | NP_057090         | Q8WTS1     | ENSG000000011198 | ENSP00000412014    | 51099           |
| MBTPS2    | query      | H__sapiens__4_-701288 | S2P     | -0.26912  | 0.764052 | NM_015884      | NP_056968         | O43462     | ENSG000000012174 | ENSP00000368798    | 51360           |
| TXNL1     | result     | H__sapiens__4_-702896 | TXNL    | -4.30402  | 0.013514 | NM_004786      | NP_004777         | O43396     | ENSG000000091164 | ENSP00000468165    | 9352            |

|         |        |                       |           |          |          |           |           |        |                  |                 |       |
|---------|--------|-----------------------|-----------|----------|----------|-----------|-----------|--------|------------------|-----------------|-------|
| FH      | query  | H__sapiens__4_-702904 | fumarase  | -0.45588 | 0.633892 | NM_000143 | NP_000134 | P07954 | ENSG000000091483 | ENSP00000355518 | 2271  |
| PSMD10  | result | H__sapiens__4_-703554 |           | -3.96941 | 0.018885 | NM_170750 | NP_736606 | O75832 | ENSG00000101843  | ENSP00000361370 | 5716  |
| CAB39L  | query  | H__sapiens__4_-703662 | MO2L      | -0.1529  | 0.858213 | NM_030925 | NP_112187 | Q9H9S4 | ENSG00000102547  | ENSP00000479669 | 81617 |
| NUBP1   | result | H__sapiens__4_-703774 | NBP35     | -4.28925 | 0.013715 | NM_002484 | NP_002475 | P53384 | ENSG00000103274  | ENSP00000461746 | 4682  |
| ATE1    | query  | H__sapiens__4_-704415 |           | -0.1426  | 0.867104 | NM_007041 | NP_008972 | O95260 | ENSG00000107669  | ENSP00000444852 | 11101 |
| XPNPEP1 | result | H__sapiens__4_-704464 | XPNPEP L1 | -4.39697 | 0.012315 | NM_020383 | NP_065116 | Q9NQW7 | ENSG00000108039  | ENSP00000421566 | 7511  |
| TBC1D12 | query  | H__sapiens__4_-704479 | KIAA0608  | -0.21905 | 0.803279 | NM_015188 | NP_056003 | O60347 | ENSG00000108239  | ENSP00000225235 | 23232 |
| DRG2    | result | H__sapiens__4_-704537 |           | -3.50461 | 0.030058 | NM_001388 | NP_001379 | P55039 | ENSG00000108591  | ENSP00000464244 | 1819  |
| EHD1    | query  | H__sapiens__4_-704713 | PAST1     | -0.41375 | 0.661163 | NM_006795 | NP_006786 | Q9H4M9 | ENSG00000110047  | ENSP00000479153 | 10938 |
| PPP6R3  | result | H__sapiens__4_-704720 | SAPS3     | -3.79507 | 0.022481 | NM_018312 | NP_060782 | Q5H9R7 | ENSG00000110075  | ENSP00000437329 | 55291 |
| PANX1   | result | H__sapiens__4_-704737 | UNQ2529   | -4.4176  | 0.012063 | NM_015368 | NP_056183 | Q96RD7 | ENSG00000110218  | ENSP00000411461 | 24145 |
| TAPBP   | query  | H__sapiens__4_-705052 | TAPA      | -0.26741 | 0.765358 | NM_172209 | NP_757346 | O15533 | ENSG00000236490  | ENSP00000450358 | 6892  |
| CCNG1   | query  | H__sapiens__4_-705154 | CCNG      | -0.39533 | 0.673455 | NM_199246 | NP_954854 | P51959 | ENSG00000113328  | ENSP00000427086 | 900   |

|          |        |                       |          |          |          |           |           |        |                 |                 |        |
|----------|--------|-----------------------|----------|----------|----------|-----------|-----------|--------|-----------------|-----------------|--------|
| CLIP4    | query  | H__sapiens__4_-705386 | RSNL2    | -0.22142 | 0.80138  | NM_024692 | NP_078968 | Q8N3C7 | ENSG00000115295 | ENSP00000414417 | 79745  |
| MTIF3    | query  | H__sapiens__4_-706211 | IF3(mt)  | -0.10382 | 0.901384 | NM_152912 | NP_690876 | Q9H2K0 | ENSG00000122033 | ENSP00000384659 | 219402 |
| CISD1    | query  | H__sapiens__4_-706306 | ZCD1     | -0.26017 | 0.770921 | NM_018464 | NP_060934 | Q9NZ45 | ENSG00000122873 | ENSP00000363041 | 55847  |
| ATPAF1   | query  | H__sapiens__4_-706375 | FLJ22351 | -0.14798 | 0.862448 | NM_022745 | NP_073582 | Q5TC12 | ENSG00000123472 | ENSP00000460964 | 64756  |
| PMEPA1   | query  | H__sapiens__4_-706474 | TMEPAI   | -0.21324 | 0.807959 | NM_199171 | NP_954640 | Q969W9 | ENSG00000124225 | ENSP00000401506 | 56937  |
| MTRR     | result | H__sapiens__4_-706488 | cblE     | -4.44617 | 0.011723 | NM_024010 | NP_076915 | Q9UBK8 | ENSG00000124275 | ENSP00000427416 | 4552   |
| GTF3C4   | result | H__sapiens__4_-706642 | TFIIIC90 | -4.43788 | 0.011821 | NM_012204 | NP_036336 | Q9UKN8 | ENSG00000125484 | ENSP00000431378 | 9329   |
| KTN1     | result | H__sapiens__4_-706837 | KNT      | -4.23298 | 0.014509 | NM_004986 | NP_004977 | Q86UP2 | ENSG00000126777 | ENSP00000452576 | 3895   |
| METTL25  | query  | H__sapiens__4_-706931 | FLJ22789 | -0.11605 | 0.890429 | NM_032230 | NP_115606 | Q8N6Q8 | ENSG00000127720 | ENSP00000450317 | 84190  |
| ATP6V1E1 | result | H__sapiens__4_-707388 | ATP6V1E  | -4.21286 | 0.014804 | NM_001696 | NP_001687 | P36543 | ENSG00000131100 | ENSP00000398932 | 529    |
| RIN2     | query  | H__sapiens__4_-707618 |          | -0.23488 | 0.790665 | NM_018993 | NP_061866 | Q8WYP3 | ENSG00000132669 | ENSP00000391239 | 54453  |
| FLNB     | result | H__sapiens__4_-708196 | TABP     | -3.99978 | 0.01832  | NM_001457 | NP_001448 | O75369 | ENSG00000136068 | ENSP00000420213 | 2317   |
| IER3     | query  | H__sapiens__4_-708443 | IEEX-1L  | -0.36221 | 0.696133 | NM_003897 | NP_003888 | P46695 | ENSG00000237155 | ENSP00000412861 | 8870   |

|         |        |                       |        |          |          |              |              |        |                 |                 |        |
|---------|--------|-----------------------|--------|----------|----------|--------------|--------------|--------|-----------------|-----------------|--------|
| PSTPIP1 | query  | H__sapiens__4_-708945 | PSTPIP | -0.4135  | 0.661331 | NM_003978    | NP_003969    | O43586 | ENSG00000140368 | ENSP00000454127 | 9051   |
| TPM1    | result | H__sapiens__4_-708957 | CMH3   | -4.0786  | 0.016931 | NM_001301289 | NP_001288218 | P09493 | ENSG00000140416 | ENSP00000477929 | 7168   |
| ATP1B1  | query  | H__sapiens__4_-709316 | ATP1B  | -0.28269 | 0.753752 | NM_001677    | NP_001668    | P05026 | ENSG00000143153 | ENSP00000477015 | 481    |
| RGS16   | query  | H__sapiens__4_-709359 | RGS-r  | -0.24755 | 0.780714 | NM_002928    | NP_002919    | O15492 | ENSG00000143333 | ENSP00000356529 | 6004   |
| SLC20A1 | query  | H__sapiens__4_-709520 | PiT-1  | -0.29409 | 0.745208 | NM_005415    | NP_005406    | Q8WUM9 | ENSG00000144136 | ENSP00000413393 | 6574   |
| PNRC1   | query  | H__sapiens__4_-709821 | PROL2  | -0.35814 | 0.698979 | NM_006813    | NP_006804    | Q12796 | ENSG00000146278 | ENSP00000358484 | 10957  |
| HNMT    | query  | H__sapiens__4_-710303 |        | -0.25528 | 0.774702 | NM_006895    | NP_008826    | P50135 | ENSG00000150540 | ENSP00000419415 | 3176   |
| BAG3    | result | H__sapiens__4_-710472 |        | -3.66564 | 0.025588 | NM_004281    | NP_004272    | O95817 | ENSG00000151929 | ENSP00000410036 | 9531   |
| SAR1B   | query  | H__sapiens__4_-710569 | SARA2  | -0.34448 | 0.708589 | NM_016103    | NP_057187    | Q9Y6B6 | ENSG00000152700 | ENSP00000426335 | 51128  |
| SQSTM1  | query  | H__sapiens__4_-711566 | PDB3   | -0.40068 | 0.669861 | NM_003900    | NP_003891    | Q13501 | ENSG00000161011 | ENSP00000487071 | 8878   |
| NLRP3   | query  | H__sapiens__4_-711803 | PYPAF1 | -0.3204  | 0.725859 | NM_183395    | NP_899632    | Q96P20 | ENSG00000162711 | ENSP00000375704 | 114548 |
| PGGT1B  | result | H__sapiens__4_-712287 | GGTI   | -4.19668 | 0.015045 | NM_005023    | NP_005014    | P53609 | ENSG00000164219 | ENSP00000404676 | 5229   |
| API5    | query  | H__sapiens__4_-712781 | API5L1 | -0.38803 | 0.678392 | NM_006595    | NP_006586    | Q9BZZ5 | ENSG00000166181 | ENSP00000436436 | 8539   |

|             |            |                           |               |                  |              |                  |                  |            |                     |                     |            |
|-------------|------------|---------------------------|---------------|------------------|--------------|------------------|------------------|------------|---------------------|---------------------|------------|
| STAT6       | resu<br>lt | H__sapiens__<br>4_-712964 | IL-4-<br>STAT | -<br>3.665<br>51 | 0.0255<br>91 | NM_003153        | NP_003144        | P42226     | ENSG00000166<br>888 | ENSP00000452<br>394 | 6778       |
| AKAP13      | quer<br>y  | H__sapiens__<br>4_-713896 | PROTO-<br>LB  | -<br>0.226<br>62 | 0.7972<br>22 | NM_007200        | NP_009131        | Q12802     | ENSG00000170<br>776 | ENSP00000483<br>091 | 11214      |
| RHNO1       | quer<br>y  | H__sapiens__<br>4_-714145 | RHINO         | -<br>0.145<br>04 | 0.8649<br>84 | NM_001257<br>098 | NP_001244<br>027 | Q9BSD<br>3 | ENSG00000171<br>792 | ENSP00000479<br>598 | 83695      |
| OXSR1       | resu<br>lt | H__sapiens__<br>4_-714418 | KIAA110<br>1  | -<br>4.284<br>76 | 0.0137<br>77 | NM_005109        | NP_005100        | O95747     | ENSG00000172<br>939 | ENSP00000415<br>851 | 9943       |
| FMNL1       | quer<br>y  | H__sapiens__<br>4_-716857 | FMNL          | -<br>0.316<br>64 | 0.7285<br>95 | NM_005892        | NP_005883        | O95466     | ENSG00000184<br>922 | ENSP00000468<br>301 | 752        |
| BLOC1S<br>2 | quer<br>y  | H__sapiens__<br>4_-717993 | MGC101<br>20  | -<br>0.180<br>41 | 0.8349<br>31 | NM_173809        | NP_776170        | Q6QNY<br>1 | ENSG00000196<br>072 | ENSP00000484<br>340 | 28299<br>1 |
| PSMD12      | resu<br>lt | H__sapiens__<br>4_-718364 | Rpn5          | -<br>4.308<br>02 | 0.0134<br>6  | NM_174871        | NP_777360        | O00232     | ENSG00000197<br>170 | ENSP00000463<br>017 | 5718       |
| STK39       | resu<br>lt | H__sapiens__<br>4_-718830 | SPAK          | -<br>3.735<br>6  | 0.0238<br>59 | NM_013233        | NP_037365        | Q9UEW<br>8 | ENSG00000198<br>648 | ENSP00000348<br>278 | 27347      |
| TXNIP       | resu<br>lt | H__sapiens__<br>4_-751999 | VDUP1         | -<br>4.365<br>64 | 0.0127<br>07 | NM_006472        | NP_006463        | Q9H3M<br>7 | ENSG00000265<br>972 | ENSP00000462<br>521 | 10628      |
| SYNRG       | quer<br>y  | H__sapiens__<br>4_-756501 | SYNG          | -<br>0.204<br>44 | 0.8151<br>06 | NM_198882        | NP_942583        | Q9UMZ<br>2 | ENSG00000275<br>066 | ENSP00000488<br>863 | 11276      |
